# Supplementary material for: Tumour-on-chip microfluidic platform for assessment of drug pharmacokinetics and treatment response
Source: PubMed Central journal article supplement (PMC8385015; doi:10.1038/s42003-021-02526-y), 2021-08-24
Supplement: 42003_2021_2526_MOESM3_ESM.pdf [file 42003_2021_2526_MOESM3_ESM.pdf]

### **Description of Additional Supplementary Files**

File Name: Supplementary Data 1

Description: Source data for graphs
